# Supplementary material for: Ritonavir-Boosted Darunavir Plus Two Nucleoside Reverse Transcriptase Inhibitors versus Other Regimens for Initial Antiretroviral Therapy for People with HIV Infection: A Systematic Review
Source: AIDS Res Treat. 2017 Sep 26;2017:2345617. doi: 10.1155/2017/2345617 (PMC5634582; doi:10.1155/2017/2345617)
Supplement: Supplementary file 1 — Supplement 1: PubMed search strategy, modified and adapted as needed for use in the other databases. Supplement 2: Detailed risk of bias assessment. Supplement 3: GRADE evidence profile. [file 2345617.f1.zip]

Archive with 4 entries (3 files):
- mat.2345617.v2/
- mat.2345617.v2/S1_PRISMA.docx
- mat.2345617.v2/S2_Risk of bias.docx
- mat.2345617.v2/S3_GRADE.docx
